# Supplementary material
Source: publisher figshare collection journal article supplement (https://acs.figshare.com/ndownloader/files/12115991)
Supplement: Supplementary file 1 [file 12115991]

## Sheet: Results
				Reference situation (2005)	Scenarios used in model simulations (2050)
					1	2	3	4	5	6	7	8	9	10	11	12	13	14	15	16	17	18	19	20	21	22	23	24	25	26	27	28	29	30	31	32	33	34	35	36	37	38	39	40	41	42	43	44	45
					ssp2	ssp2	ssp2	ssp2	ssp2	ssp2	ssp1	ssp1	ssp1	ssp1	ssp1	ssp1	ssp5	ssp5	ssp5	ssp5	ssp5	ssp5	ssp2	ssp2	ssp2	ssp2	ssp2	ssp1	ssp1	ssp1	ssp1	ssp1	ssp5	ssp5	ssp5	ssp5	ssp5	ssp2	ssp2	ssp2	ssp2	ssp2	ssp1	ssp1	ssp1	ssp1	ssp1	ssp5	ssp5
					baseline	hydrogen	mixed	cellulose	sugar	methane	baseline	hydrogen	mixed	cellulose	sugar	methane	baseline	hydrogen	mixed	cellulose	sugar	methane	hydrogen	mixed	cellulose	sugar	methane	hydrogen	mixed	cellulose	sugar	methane	hydrogen	mixed	cellulose	sugar	methane	hydrogen	mixed	cellulose	sugar	methane	hydrogen	mixed	cellulose	sugar	methane	hydrogen	mixed
					baseline	defaultfeed	defaultfeed	defaultfeed	defaultfeed	defaultfeed	baseline	defaultfeed	defaultfeed	defaultfeed	defaultfeed	defaultfeed	baseline	defaultfeed	defaultfeed	defaultfeed	defaultfeed	defaultfeed	lowfeed	lowfeed	lowfeed	lowfeed	lowfeed	lowfeed	lowfeed	lowfeed	lowfeed	lowfeed	lowfeed	lowfeed	lowfeed	lowfeed	lowfeed	highfeed	highfeed	highfeed	highfeed	highfeed	highfeed	highfeed	highfeed	highfeed	highfeed	highfeed	highfeed
	Production	Crop production (excluding forage)	million t DM/yr	3572.28	6569.42	5924.75	6499.75	7220.17	6930.19	5925.24	6140.07	5313.4	6051.91	6974.15	6600.51	5316.43	6618.5	5778.29	6529.64	7465.54	7089.9	5777.09	6031.66	6497.87	7074.42	6844.64	6031.99	5584.53	6030.01	6570.11	6346.44	5595.36	6059.56	6514.44	7086.92	6856.56	6056.5	5921.26	6499.71	7219.09	6929.34	5923.22	5303.42	6063.65	7011.8	6627.72	5306.37	5774.15	6531.5
		Livestock production	Mt DM	205.856	454.111	454.111	454.111	454.111	454.111	454.111	469.425	469.425	469.425	469.425	469.425	469.425	542.496	542.496	542.496	542.496	542.496	542.496	454.111	454.111	454.111	454.111	454.111	469.425	469.425	469.425	469.425	469.425	542.496	542.496	542.496	542.496	542.496	454.111	454.111	454.111	454.111	454.111	469.425	469.425	469.425	469.425	469.425	542.496	542.496
		Forage production on cropland	Mt DM	857.863	2226.18	2226.18	2479.71	2226.18	2226.18	3239.94	2320.72	2320.72	2644.8	2320.72	2320.72	3616.8	2739.61	2739.61	3070.02	2739.61	2739.61	4061.18	2226.18	2430.57	2226.18	2226.18	3042.44	2320.72	2512.5	2320.72	2320.72	3085	2739.61	2941.63	2739.61	2739.61	3547.83	2226.18	2479.83	2226.18	2226.18	3240.33	2320.72	2654.35	2320.72	2320.72	3654.48	2739.61	3072.55
		MP production	Mt DM	0	0	233.552	233.219	233.153	233.037	233.133	0	299.636	298.118	297.949	298.049	298.06	0	304.173	303.939	303.716	304.019	303.922	189.173	188.015	187.775	187.938	187.715	179.081	176.418	175.481	175.56	175.761	187.533	185.832	185.794	185.802	185.865	233.813	233.328	233.153	233.271	233.223	307.02	306.899	306.491	306.737	306.725	306.31	306.263
		Crop production (excluding forage)	Mt Nr	59.4773	115.894	88.3752	89.9622	92.3426	90.8165	88.4061	113.984	78.8454	80.9493	83.9568	81.9504	78.9116	124.651	88.6465	90.7766	93.8411	91.8197	88.6668	93.7162	94.9935	96.8862	95.6736	93.7439	93.2095	94.4283	96.236	95.0758	93.2291	102.592	103.933	105.776	104.577	102.639	88.3306	89.9574	92.3263	90.7692	88.3751	77.8144	79.9315	83.0551	80.9905	77.8515	88.396	90.5142
		Livestock production	Mt Nr	10.5504	23.1569	23.1569	23.1569	23.1569	23.1569	23.1569	23.7923	23.7923	23.7923	23.7923	23.7923	23.7923	27.5569	27.5569	27.5569	27.5569	27.5569	27.5569	23.1569	23.1569	23.1569	23.1569	23.1569	23.7923	23.7923	23.7923	23.7923	23.7923	27.5569	27.5569	27.5569	27.5569	27.5569	23.1569	23.1569	23.1569	23.1569	23.1569	23.7923	23.7923	23.7923	23.7923	23.7923	27.5569	27.5569
		Forage production on cropland	Mt Nr	17.2431	44.7462	44.7462	49.8422	44.7462	44.7462	65.1227	46.6465	46.6465	53.1605	46.6465	46.6465	72.6978	55.0662	55.0662	61.7075	55.0662	55.0662	81.6298	44.7462	48.8545	44.7462	44.7462	61.1531	46.6465	50.5013	46.6465	46.6465	62.0085	55.0662	59.1267	55.0662	55.0662	71.3113	44.7462	49.8446	44.7462	44.7462	65.1306	46.6465	53.3524	46.6465	46.6465	73.4551	55.0662	61.7582
		MP production	Mt Nr	0	0	26.1578	26.1205	26.1132	26.1001	26.1109	0	33.5592	33.3892	33.3703	33.3815	33.3827	0	34.0674	34.0412	34.0162	34.0502	34.0392	21.1874	21.0577	21.0308	21.0491	21.0241	20.057	19.7588	19.6538	19.6627	19.6852	21.0037	20.8132	20.809	20.8098	20.8168	26.187	26.1327	26.1132	26.1263	26.121	34.3862	34.3727	34.327	34.3545	34.3532	34.3067	34.3014
	Total Feed	Roughage (Grazing, Forage, Crop Residues & Scavenging)	Mt DM	6199.46	8032.03	8022.94	8055.82	8048.2	8056.77	8047.86	6344.43	6344.62	6343.64	6353.63	6351.29	6351.04	7162.62	7169.09	7170.51	7170.5	7173.9	7174.68	8059.85	8053.3	8068.91	8053.16	8050.95	6380.68	6381.32	6370.72	6380.93	6380.06	7201.65	7202.83	7202.55	7214.22	7201.26	8051.51	8029.94	8042.39	8040.18	8027.1	6343.69	6342.98	6329.45	6327.9	6329.74	7169.78	7151.25
		Cereals	Mt DM	663.534	1108.02	914.876	915.051	914.692	914.774	915.199	1065.27	828.739	829.53	829.585	829.523	829.531	1205.64	985.3	985.251	985.27	985.251	985.273	958.355	960.526	958.495	960.024	957.295	872.4	888.94	876.684	874.381	884.524	1049.65	1047.23	1047.51	1047.63	1048.5	913.844	913.854	913.862	913.866	913.875	828.256	828.256	828.256	828.256	828.254	984.343	984.343
		Other concentrates	Mt DM	475.154	1268.19	846.707	847.042	846.942	846.897	847.328	1419.19	867.768	869.418	871.077	870.135	870.018	1526.21	949.17	948.578	948.351	948.569	948.447	904.249	906.167	906.749	906.157	906.821	1077.95	1074.65	1087.4	1084.64	1080.74	1149.48	1149.42	1149.05	1149	1149.18	844.426	846.942	847.03	846.625	846.625	860.996	861.886	863.802	861.926	862.565	945.909	945.908
		Microbial Protein	Mt DM	0	0	233.552	233.219	233.153	233.037	233.133	0	299.636	298.118	297.949	298.049	298.06	0	304.173	303.939	303.716	304.019	303.922	189.173	188.015	187.775	187.938	187.715	179.081	176.418	175.481	175.56	175.761	187.533	185.832	185.794	185.802	185.865	233.813	233.328	233.153	233.271	233.223	307.02	306.899	306.491	306.737	306.725	306.31	306.263
		Roughage (Grazing, Forage, Crop Residues & Scavenging)	Mt Nr	96.5947	130.362	130.362	130.362	130.362	130.362	130.362	105.929	105.929	105.929	105.929	105.929	105.929	120.652	120.652	120.652	120.652	120.652	120.652	130.362	130.362	130.362	130.362	130.362	105.929	105.929	105.929	105.929	105.929	120.652	120.652	120.652	120.652	120.652	130.362	130.362	130.362	130.362	130.362	105.929	105.929	105.929	105.929	105.929	120.652	120.652
		Cereals	Mt Nr	11.6916	18.9839	15.6851	15.6995	15.7049	15.7181	15.7062	18.4642	14.1822	14.2099	14.2032	14.1953	14.2072	20.6884	16.8819	16.8945	16.9236	16.8865	16.9102	16.5207	16.5159	16.5245	16.5233	16.5302	15.0784	15.4066	15.1448	15.1743	15.3327	18.1013	18.1235	18.121	18.1163	18.1203	15.6668	15.6695	15.6888	15.6767	15.682	14.1445	14.1431	14.143	14.1445	14.1443	16.8585	16.8638
		Other concentrates	Mt Nr	19.7109	51.6782	28.8191	28.842	28.8439	28.8438	28.8448	58.6782	29.401	29.5433	29.569	29.5656	29.5525	63.0972	32.8363	32.8499	32.8458	32.8488	32.8362	32.9539	33.0884	33.1067	33.0895	33.1077	42.007	41.977	42.3438	42.3053	42.1244	44.6805	44.8489	44.8556	44.8594	44.8484	28.8081	28.8598	28.8599	28.859	28.859	28.6116	28.6266	28.6725	28.6433	28.6449	32.6203	32.6203
		Microbial Protein	Mt Nr	0	0	26.1578	26.1205	26.1132	26.1001	26.1109	0	33.5592	33.3892	33.3703	33.3815	33.3827	0	34.0674	34.0412	34.0162	34.0502	34.0392	21.1874	21.0577	21.0308	21.0491	21.0241	20.057	19.7588	19.6538	19.6627	19.6852	21.0037	20.8132	20.809	20.8098	20.8168	26.187	26.1327	26.1132	26.1263	26.121	34.3862	34.3727	34.327	34.3545	34.3532	34.3067	34.3014
	Ruminant feed	Roughage (Grazing, Forage, Crop Residues & Scavenging)	Mt DM	5928.57	7610.75	7600.23	7633.11	7625.55	7634.13	7625.77	5912.95	5911.06	5911.62	5914.67	5919.21	5917.48	6669.63	6675.65	6675.37	6670.69	6678.9	6681.26	7637.15	7630.66	7646.2	7630.45	7628.24	5948.66	5949.3	5938.7	5948.91	5948.72	6708.23	6709.41	6709.13	6720.8	6707.84	7630.19	7608.63	7621.08	7618.9	7605.85	5910.66	5910.89	5896.44	5895.89	5897.72	6676.8	6658.45
		Cereals	Mt DM	146.595	292.144	288.692	288.692	288.692	288.692	288.692	308.08	268.494	268.494	268.494	268.494	268.494	315.36	311.277	311.277	311.277	311.277	311.277	288.692	288.692	288.692	288.692	288.692	268.494	279.245	273.632	273.12	268.494	311.277	311.277	311.277	311.277	311.277	288.692	288.692	288.692	288.692	288.692	268.494	268.494	268.494	268.494	268.494	311.277	311.277
		Other concentrates	Mt DM	218.626	861.028	489.784	494.328	494.299	484.475	493.667	1066.95	568.608	562.516	577.403	563.908	562.98	1132.88	616.966	608.831	609.746	608.124	616.889	510.168	526.91	530.766	527.989	530.298	758.553	755.902	748.913	756.639	759.831	811.286	794.918	814.449	795.599	797.471	500.294	500.791	496.674	499.697	501.016	552.974	558.446	559.473	557.909	563.108	617.006	620.134
		Microbial Protein	Mt DM	0	0	188.01	186.202	184.779	182.55	184.519	0	251.872	254.135	253.009	252.246	253.069	0	252.958	249.065	248.36	250.608	251.185	154.778	154.403	153.691	154.409	153.7	145.136	144.597	144.422	144.365	143.963	150.293	147.694	147.992	147.139	147.564	187.32	181.127	180.838	180.71	177.72	263.03	258.746	259.903	263.666	264.138	255.124	245.627
		Roughage (Grazing, Forage, Crop Residues & Scavenging)	Mt Nr	92.3063	123.616	123.616	123.616	123.616	123.616	123.616	99.027	99.027	99.027	99.027	99.027	99.027	112.739	112.739	112.739	112.739	112.739	112.739	123.616	123.616	123.616	123.616	123.616	99.027	99.027	99.027	99.027	99.027	112.739	112.739	112.739	112.739	112.739	123.616	123.616	123.616	123.616	123.616	99.027	99.027	99.027	99.027	99.027	112.739	112.739
		Cereals	Mt Nr	2.7251	5.3183	5.2433	5.2433	5.2433	5.2433	5.2433	5.6884	4.8294	4.8294	4.8294	4.8294	4.8294	5.7407	5.6521	5.6521	5.6521	5.6521	5.6521	5.2433	5.2433	5.2433	5.2433	5.2433	4.8294	5.0627	4.9409	4.9298	4.8294	5.6521	5.6521	5.6521	5.6521	5.6521	5.2433	5.2433	5.2433	5.2433	5.2433	4.8294	4.8294	4.8294	4.8294	4.8294	5.6521	5.6521
		Other concentrates	Mt Nr	10.7213	38.8023	17.8201	18.0227	18.1821	18.4317	18.2111	47.9702	20.6195	20.366	20.4922	20.5776	20.4856	50.7822	22.5394	22.9753	23.0543	22.8026	22.738	21.5421	21.5842	21.6638	21.5835	21.6629	32.574	32.401	32.5426	32.5599	32.7053	34.0379	34.329	34.2956	34.3911	34.3436	17.8974	18.5911	18.6235	18.6379	18.9726	19.3699	19.8497	19.7202	19.2987	19.2458	22.2968	23.3605
		Microbial Protein	Mt Nr	0	0	21.0571	20.8546	20.6952	20.4457	20.6662	0	28.2097	28.4632	28.337	28.2516	28.3437	0	28.3313	27.8953	27.8164	28.0681	28.1327	17.3352	17.2931	17.2134	17.2938	17.2144	16.2552	16.1949	16.1752	16.1689	16.1239	16.8328	16.5417	16.5751	16.4796	16.5272	20.9799	20.2862	20.2539	20.2395	19.9046	29.4593	28.9796	29.1091	29.5306	29.5835	28.5738	27.5102
	Monogastric feed	Roughage (Grazing, Forage, Crop Residues & Scavenging)	Mt DM	270.89	394.356	394.356	394.356	394.356	394.356	394.356	410.958	410.958	410.958	410.958	410.958	410.958	465.802	465.802	465.802	465.802	465.802	465.802	394.356	394.356	394.356	394.356	394.356	410.958	410.958	410.958	410.958	410.958	465.802	465.802	465.802	465.802	465.802	394.356	394.356	394.356	394.356	394.356	410.958	410.958	410.958	410.958	410.958	465.802	465.802
		Cereals	Mt DM	516.938	815.874	626.184	626.359	626	626.082	626.508	757.189	560.245	561.036	561.09	561.029	561.037	890.281	674.023	673.974	673.993	673.974	673.995	669.663	671.834	669.803	671.332	668.604	603.906	609.695	603.052	601.261	616.03	738.371	735.955	736.231	736.352	737.221	625.152	625.162	625.17	625.174	625.184	559.761	559.761	559.761	559.761	559.76	673.066	673.066
		Other concentrates	Mt DM	256.528	407.158	356.923	352.714	352.643	362.422	353.662	352.241	299.16	306.903	293.674	306.227	307.038	393.322	332.204	339.748	338.605	340.445	331.558	394.081	379.257	375.984	378.169	376.522	319.399	318.748	338.483	327.999	320.906	338.189	354.499	334.602	353.405	351.713	344.131	346.151	350.356	346.928	345.609	308.022	303.44	304.33	304.016	299.456	328.903	325.774
		Microbial Protein	Mt DM	0	0	45.5421	47.017	48.3748	50.4861	48.6137	0	47.7638	43.9826	44.94	45.8029	44.9912	0	51.2155	54.8735	55.3558	53.4111	52.7366	34.3947	33.6127	34.084	33.529	34.0158	33.945	31.8206	31.0589	31.1951	31.7977	37.2406	38.1381	37.802	38.6627	38.3006	46.4927	52.2008	52.3153	52.5609	55.5032	43.9902	48.1532	46.5886	43.0708	42.5871	51.1865	60.6361
		Roughage (Grazing, Forage, Crop Residues & Scavenging)	Mt Nr	4.2885	6.3097	6.3097	6.3097	6.3097	6.3097	6.3097	6.5753	6.5753	6.5753	6.5753	6.5753	6.5753	7.4528	7.4528	7.4528	7.4528	7.4528	7.4528	6.3097	6.3097	6.3097	6.3097	6.3097	6.5753	6.5753	6.5753	6.5753	6.5753	7.4528	7.4528	7.4528	7.4528	7.4528	6.3097	6.3097	6.3097	6.3097	6.3097	6.5753	6.5753	6.5753	6.5753	6.5753	7.4528	7.4528
		Cereals	Mt Nr	8.9665	13.6656	10.4418	10.4561	10.4615	10.4747	10.4629	12.7757	9.3528	9.3805	9.3737	9.3659	9.3778	14.9477	11.2297	11.2424	11.2715	11.2344	11.258	11.2774	11.2725	11.2812	11.28	11.2868	10.249	10.3439	10.2039	10.2445	10.5033	12.4492	12.4714	12.4689	12.4642	12.4682	10.4235	10.4262	10.4455	10.4333	10.4387	9.3151	9.3137	9.3135	9.3151	9.3149	11.2064	11.2116
		Other concentrates	Mt Nr	8.9896	12.8757	10.9989	10.8193	10.6618	10.4121	10.6338	10.708	8.7815	9.1772	9.0767	8.9879	9.0669	12.3151	10.2969	9.8745	9.7914	10.0463	10.0982	11.4118	11.5042	11.4427	11.5061	11.4447	9.433	9.576	9.8012	9.7454	9.4192	10.6426	10.5199	10.56	10.4683	10.5049	10.9107	10.2687	10.2366	10.2212	9.8863	9.2417	8.7769	8.9523	9.3447	9.3991	10.3235	9.2599
		Microbial Protein	Mt Nr	0	0	5.1007	5.2659	5.418	5.6544	5.4447	0	5.3495	4.926	5.0333	5.1299	5.039	0	5.7361	6.1458	6.1998	5.982	5.9065	3.8522	3.7646	3.8174	3.7552	3.8098	3.8018	3.5639	3.4786	3.4939	3.5613	4.1709	4.2715	4.2338	4.3302	4.2897	5.2072	5.8465	5.8593	5.8868	6.2164	4.9269	5.3932	5.2179	4.8239	4.7698	5.7329	6.7912
	Microbial protein share in feedmix	All animals	% DM	0	0	2.3313	2.32032	2.32155	2.31843	2.32123	0	3.59243	3.57425	3.56729	3.56988	3.57016	0	3.23323	3.23055	3.22833	3.23022	3.22898	1.87085	1.86006	1.85513	1.85943	1.85806	2.10433	2.07031	2.06198	2.06165	2.06266	1.95585	1.93872	1.9384	1.93611	1.93916	2.32798	2.32768	2.32307	2.32481	2.32738	3.68131	3.67984	3.68025	3.6846	3.68338	3.25642	3.26236
		Ruminants	% DM	0	0	2.19466	2.16455	2.15026	2.12519	2.14741	0	3.59816	3.63218	3.60742	3.60153	3.61423	0	3.21958	3.17501	3.16783	3.19291	3.19549	1.80168	1.79524	1.7831	1.79513	1.78701	2.03818	2.02828	2.03248	2.02673	2.02167	1.88311	1.85469	1.85388	1.84505	1.85285	2.1765	2.11123	2.10588	2.10421	2.07295	3.76017	3.69819	3.72124	3.77423	3.77693	3.24576	3.1348
		Monogastrics	% DM	0	0	3.20041	3.31001	3.40338	3.52225	3.41595	0	3.62361	3.32476	3.4288	3.45939	3.39807	0	3.36227	3.57623	3.60917	3.48265	3.4602	2.30451	2.27257	2.31199	2.26948	2.30851	2.48098	2.3206	2.24487	2.27467	2.3047	2.35759	2.39201	2.40099	2.42518	2.40425	3.29704	3.68163	3.67848	3.70403	3.90688	3.32571	3.64159	3.52507	3.26837	3.24409	3.36985	3.97541
		All animals	% Nr	0	0	13.0123	12.9937	12.9901	12.9836	12.9889	0	18.3312	18.2383	18.228	18.2341	18.2348	0	16.664	16.6512	16.6389	16.6556	16.6502	10.5397	10.4752	10.4618	10.4709	10.4585	10.9558	10.7929	10.7356	10.7404	10.7527	10.2739	10.1807	10.1787	10.1791	10.1825	13.0268	12.9998	12.9901	12.9966	12.994	18.7829	18.7756	18.7506	18.7656	18.7649	16.7811	16.7785
		Ruminants	% Nr	0	0	12.5536	12.4329	12.3379	12.1891	12.3206	0	18.4757	18.6417	18.5591	18.5031	18.5634	0	16.7382	16.4806	16.434	16.5827	16.6208	10.3348	10.3097	10.2621	10.3101	10.2627	10.6462	10.6067	10.5938	10.5897	10.5602	9.94484	9.77285	9.79259	9.73617	9.76428	12.5076	12.0941	12.0748	12.0662	11.8666	19.2941	18.9799	19.0647	19.3408	19.3754	16.8814	16.2531
		Monogastrics	% Nr	0	0	15.5267	16.0296	16.4926	17.2123	16.5739	0	17.7966	16.3878	16.7447	17.0661	16.7637	0	16.5232	17.7033	17.8589	17.2315	17.014	11.7262	11.4596	11.6203	11.431	11.5972	12.6478	11.8563	11.5726	11.6234	11.8477	12.0145	12.3043	12.1957	12.4734	12.3567	15.8509	17.797	17.8359	17.9197	18.923	16.3908	17.942	17.3589	16.0481	15.8681	16.5139	19.5624
	Substrate for microbial production	Substrate Requirement	Mt DM	0	0	0	897.892	1282.34	1002.06	1305.55	0	0	1147.75	1638.72	1281.61	1669.14	0	0	1170.16	1670.44	1307.28	1701.96	0	723.859	1032.76	808.134	1051.21	0	679.208	965.143	754.908	984.261	0	715.454	1021.87	798.948	1040.84	0	898.312	1282.34	1003.06	1306.05	0	1181.56	1685.7	1318.97	1717.66	0	1179.11
		Substrate Requirement	Mt Nr	0	0	0	6.6726	3.8983	2.4049	20.3765	0	0	8.5294	4.9817	3.0759	26.0513	0	0	8.6959	5.0781	3.1375	26.5636	0	5.3793	3.1396	1.9395	16.4069	0	5.0474	2.934	1.8118	15.362	0	5.3168	3.1065	1.9175	16.2451	0	6.6757	3.8983	2.4074	20.3844	0	8.7806	5.1245	3.1655	26.8086	0	8.7624
	Land use	Crop yield	t DM/ha	3.00546	4.73832	4.66595	4.94255	5.36769	5.14787	5.00228	4.97085	5.12237	5.74299	6.07598	5.85378	5.65006	5.26455	5.35377	5.75584	6.15456	5.90415	5.85446	4.75007	4.89914	5.19893	4.99241	4.89858	5.05262	5.4888	5.60751	5.51072	5.35262	5.28646	5.55647	5.76021	5.66252	5.58779	4.75354	5.08812	5.30235	5.13506	4.99402	5.1307	5.74052	6.09335	5.87358	5.65981	5.27098	5.72527
		Cropland Area	million ha	1474.03	1856.27	1746.89	1816.77	1759.85	1778.67	1832.2	1702.08	1490.35	1514.32	1529.77	1524.01	1581.09	1777.57	1591.01	1667.81	1658.15	1664.85	1680.48	1738.47	1822.45	1788.95	1816.92	1852.46	1564.59	1556.35	1585.52	1572.78	1621.7	1664.47	1701.81	1705.93	1694.68	1718.81	1713.97	1764.81	1781.34	1782.94	1834.9	1485.98	1518.68	1531.59	1523.51	1583.24	1615.21	1677.49
		Pasture Area	million ha	3245.7	2980.62	2977.46	2990.61	2980.55	3016.66	2951.91	2919.96	2994.12	2966.94	2976.13	2941.85	2933.68	2905.21	2928.93	2929.7	2935	2949.71	2911.07	2996.03	2978.26	2988.53	3006.26	2947.01	2972.92	2981.77	2953.94	2926.69	2929.84	2883.58	2907.36	2904.74	2919.65	2887.63	3015.4	3006.38	3007.6	3002.49	2972.46	2989.76	2977.2	2976.81	2938.95	2933.58	2899.1	2929.59
		Cropland Expansion *****	million ha			-109.378	-39.5061	-96.4184	-77.5977	-24.0725		-211.732	-187.764	-172.311	-178.072	-120.995		-186.562	-109.76	-119.425	-112.724	-97.0956	-117.805	-33.8206	-67.326	-39.35	-3.8105	-137.496	-145.727	-116.559	-129.3	-80.3814	-113.098	-75.7574	-71.6389	-82.8902	-58.7654	-142.297	-91.4655	-74.9361	-73.3279	-21.3675	-216.098	-183.404	-170.492	-178.576	-118.838	-162.357	-100.086
		Cropland Expansion *****	%			-5.89232	-2.12825	-5.1942	-4.1803	-1.29682		-12.4396	-11.0314	-10.1235	-10.462	-7.10866		-10.4953	-6.17473	-6.71846	-6.34147	-5.46226	-6.34632	-1.82196	-3.62695	-2.11984	-0.205277	-8.07809	-8.5617	-6.848	-7.59655	-4.72253	-6.36252	-4.26185	-4.03016	-4.66311	-3.30594	-7.66576	-4.92738	-4.03692	-3.95028	-1.1511	-12.6961	-10.7753	-10.0167	-10.4916	-6.98194	-9.13366	-5.63048
	Nitrogen Budget Cropland	Total Withdrawals	Mt Nr	137.264	271.878	235.075	248.274	244.098	243.968	268.907	266.952	219.046	235.544	230.875	230.247	262.346	298.361	249.866	266.886	261.992	261.414	293.986	241.886	252.675	249.443	249.256	269.487	237.93	247.583	244.944	244.437	263.442	268.177	278.584	275.622	275.216	295.176	234.687	247.993	244.191	243.807	268.892	217.764	234.791	229.911	229.206	262.318	249.611	266.743
		- Harvest	Mt Nr	76.7204	160.64	133.121	139.804	137.089	135.563	153.529	160.631	125.492	134.11	130.603	128.597	151.609	179.717	143.713	152.484	148.907	146.886	170.297	138.462	143.848	141.632	140.42	154.897	139.856	144.93	142.882	141.722	155.238	157.659	163.06	160.842	159.643	173.951	133.077	139.802	137.072	135.515	153.506	124.461	133.284	129.702	127.637	151.307	143.462	152.272
		- Crop residues *	Mt Nr	60.544	111.238	101.954	108.47	107.01	108.405	115.378	106.321	93.5544	101.435	100.272	101.65	110.737	118.644	106.153	114.402	113.084	114.528	123.689	103.423	108.828	107.811	108.836	114.59	98.0743	102.654	102.061	102.715	108.205	110.518	115.524	114.78	115.573	121.225	101.61	108.191	107.119	108.291	115.387	93.303	101.507	100.21	101.569	111.012	106.149	114.471
		Total Inputs	Mt Nr	237.7	401.812	354.956	374.023	370.005	369.213	400.272	379.749	324.437	345.824	342.503	340.289	378.744	467.871	407.66	432.213	430.088	427.164	468.549	363.574	379.152	376.13	375.326	400.601	345.367	358.211	355.971	354.771	377.589	429.636	446.72	443.477	442.169	467.828	354.353	373.594	370.176	368.942	400.241	323.093	346.142	341.555	339.273	377.579	407.845	434.199
		- Fertilizer	Mt Nr	86.9079	125.662	114.341	116.173	123.834	121.031	120.532	100.297	84.1862	92.6301	95.9691	92.8052	102.145	162.131	142.835	152.609	152.449	151.686	165.773	116.178	116.66	125.001	117.164	124.597	89.9062	94.4081	91.7377	93.6106	99.138	139.258	154.814	154.431	155.488	162.507	108.223	123.232	124.621	122.407	130.047	83.9376	93.4883	95.8611	92.7378	101.04	143.654	153.311
		- Manure application	Mt Nr	26.0578	63.6627	63.6627	63.6627	63.6627	63.6627	63.6627	71.7336	71.7336	71.7336	71.7336	71.7336	71.7336	70.9196	70.9196	70.9196	70.9196	70.9196	70.9196	63.6627	63.6627	63.6627	63.6627	63.6627	71.7336	71.7336	71.7336	71.7336	71.7336	70.9196	70.9196	70.9196	70.9196	70.9196	63.6627	63.6627	63.6627	63.6627	63.6627	71.7336	71.7336	71.7336	71.7336	71.7336	70.9196	70.9196
		- Biological fixation	Mt Nr	35.8782	83.4272	63.1663	67.9323	63.1764	64.3302	79.8405	87.3037	61.5476	67.0155	61.7224	62.6531	82.6132	96.8483	70.1166	75.9193	70.356	71.3914	91.4955	66.7906	70.8389	67.1799	67.9165	80.577	72.9943	75.7522	72.9461	73.3897	85.0463	80.9555	84.3864	81.0617	81.615	93.9351	62.7994	67.7094	63.5009	64.1532	79.8474	60.6723	66.3709	60.896	61.7426	82.3867	70.0508	75.8555
		- Recycled Residues *	Mt Nr	45.109	90.114	82.2496	88.0858	87.3577	87.4379	94.4505	88.7946	78.0188	85.0619	84.6031	84.5814	93.6578	99.2828	88.71	96.1261	95.5933	95.5402	104.733	83.5364	88.3363	87.8867	87.831	93.6328	81.8049	85.9333	85.7428	85.58	91.065	92.3429	96.8646	96.6192	96.4524	102.093	81.9722	87.8961	87.4418	87.3231	94.4756	77.817	85.1329	84.5808	84.5045	93.9235	88.6839	96.1796
		- Other Nr inputs ****	Mt Nr	43.7475	38.9467	31.5363	38.1689	31.9744	32.7506	41.7857	31.6196	28.9508	29.3826	28.4751	28.5161	28.5945	38.6894	35.0794	36.6387	40.7706	37.6271	35.6277	33.4053	39.6543	32.3996	38.7515	38.1321	28.9276	30.3842	33.8109	30.457	30.6058	46.1604	39.7359	40.4455	37.694	38.373	37.6953	31.0937	30.9505	31.3967	32.2077	28.9321	29.4159	28.483	28.5542	28.4951	34.5367	37.9333
		Nr surplus	Mt Nr	100.436	129.934	119.882	125.749	125.907	125.245	131.365	112.797	105.391	110.279	111.628	110.043	116.398	169.51	157.794	165.327	168.096	165.75	174.563	121.688	126.477	126.687	126.069	131.114	107.436	110.628	111.028	110.334	114.147	161.459	168.136	167.855	166.953	172.652	119.666	125.601	125.985	125.136	131.349	105.329	111.351	111.643	110.067	115.26	158.234	167.456
		Change in Nr Surplus *****	Mt Nr			-10.0525	-4.1854	-4.0273	-4.6895	1.431		-7.4064	-2.5179	-1.1687	-2.7542	3.6013		-11.7151	-4.1829	-1.4131	-3.7594	5.0537	-8.2459	-3.4569	-3.2468	-3.8648	1.1799	-5.3607	-2.1688	-1.7695	-2.4634	1.3495	-8.0502	-1.3734	-1.6551	-2.5563	3.1422	-10.2682	-4.3334	-3.9489	-4.7983	1.4146	-7.4683	-1.4461	-1.1539	-2.7303	2.4634	-11.2757	-2.0538
		Change in Nr Surplus *****	%			-7.73662	-3.22117	-3.0995	-3.60914	1.10133		-6.56613	-2.23224	-1.03611	-2.44173	3.19272		-6.91117	-2.46765	-0.83364	-2.21781	2.98137	-6.34622	-2.6605	-2.49881	-2.97443	0.908076	-4.75252	-1.92274	-1.56875	-2.18392	1.1964	-4.74911	-0.81022	-0.976405	-1.50806	1.8537	-7.90263	-3.33508	-3.03916	-3.69287	1.08871	-6.621	-1.28204	-1.02299	-2.42054	2.18392	-6.65195	-1.21161
	Greenhouse Gases	Emissions	Mt CO2 equivalents ***	12140.9	11813	11205.7	12421.2	11576	11947.4	12346.3	9818.37	8443.75	9380.04	8630.31	8594.71	8347.82	11632.4	11005.5	11415.6	11218.8	11961.1	11401.7	11293.9	12193.6	12008.7	11889.3	12108.5	9480.88	8602.17	9112.27	9007.72	8771.53	11579	11595.5	11051.9	11646.9	11528.5	11245.7	12087.7	11550.9	11480.4	12003	8352.99	9514.49	8532.04	8916.2	8470.99	11213.6	11695.7
		- CO2	Mt CO2	5645.07	442.35	39.6894	1089	351.818	536.894	894.911	-1046.79	-2301.33	-1473.91	-2204.8	-2296.22	-2538.26	-771.052	-1283.43	-925.87	-1218.63	-469.532	-1037.31	-5.3575	846.124	769.416	610.998	718.582	-1391.1	-2236.45	-1767.71	-1900.87	-2119.44	-820.081	-795.941	-1381.98	-728.527	-908.085	50.17	629.932	206.708	240.966	624.99	-2383.55	-1376.74	-2293.74	-1890.28	-2417.51	-1037.62	-688.723
		- N2O	Mt CO2 equivalents ***	1882.4	2836.17	2625.31	2803.54	2719.03	2703.06	2927.65	2296.25	2137.13	2228.72	2228.88	2214.15	2314.2	2933.36	2754.25	2870.2	2949.24	2928.98	2984.19	2661.11	2829.23	2728.99	2756.8	2854.55	2173.88	2246.99	2284.88	2242.68	2306.37	2924.68	2909.95	2941.58	2886.49	2975.82	2686.03	2711.02	2715.22	2702.83	2788.88	2135.83	2235.73	2229.7	2215.4	2313.18	2755.4	2902.67
		- CH4	Mt CO2 equivalents ***	4613.46	8534.43	8540.67	8528.7	8505.19	8707.47	8523.7	8568.91	8607.95	8625.23	8606.23	8676.78	8571.88	9470.07	9534.65	9471.32	9488.23	9501.7	9454.83	8638.19	8518.21	8510.29	8521.46	8535.33	8698.09	8591.62	8595.11	8665.91	8584.6	9474.37	9481.47	9492.3	9488.98	9460.74	8509.46	8746.71	8629.02	8536.65	8589.14	8600.71	8655.49	8596.08	8591.08	8575.32	9495.84	9481.75
		Total cumulative emissions since 2005	Mt CO2 equivalents ***	12140.9	566861	526600	578428	541892	566386	576508	512420	464849	479799	477465	505281	509594	551566	506811	545518	530029	575699	550055	529333	574863	550641	568226	575259	486300	491072	486570	509938	507940	525078	544366	539399	565949	586839	524526	564081	542499	573557	580581	465761	486653	476848	507487	507182	512798	550080
		- CO2	Mt CO2	5645.07	123868	89185.2	137608	101560	124188	133499	69447.6	27630.3	39772.1	36825.3	64057	66918.9	79436.9	42158.9	76951	60558.6	107271	79438.3	90872.2	134149	110262	126451	132089	47306.2	51019.5	45427.2	68395.7	65248	59229	75365.5	69498.9	97565.8	116137	87385.5	122347	101538	132231	137347	28726.9	46894	36336.5	67410.7	64904.5	48062.3	81102.7
		- N2O	Mt CO2 equivalents ***	1882.4	120216	115129	118681	117839	117887	121086	110659	105688	108366	108438	108774	111839	125018	119251	122298	122708	123172	125986	115895	119066	118447	118641	121127	106727	108813	109054	109123	111555	120947	122984	123334	123200	126145	115523	118212	117837	118068	120721	105676	108264	108428	108641	111782	119392	122671
		- CH4	Mt CO2 equivalents ***	4613.46	322777	322285	322139	322494	324311	321923	332314	331530	331661	332201	332450	330836	347111	345401	346269	346763	345256	344631	322565	321648	321931	323133	322044	332266	331239	332089	332419	331137	344903	346016	346567	345183	344557	321618	323522	323124	323258	322513	331358	331496	332084	331435	330495	345344	346306
		Change in cumulative emissions *****	Mt CO2 equivalents ***			-40261	11567.4	-24968.3	-474.217	9647.58		-47571.8	-32621.3	-34955.3	-7139.89	-2826.7		-44754.6	-6047.66	-21536.7	24133.4	-1510.55	-37528	8002.33	-16219.8	1364.86	8398.39	-26120.8	-21348.4	-25850.1	-2482.74	-4480.16	-26487.4	-7200.15	-12166.5	14382.7	35273	-42334.3	-2779.34	-24362.1	6696.73	13720	-46659.8	-25767.1	-35572.1	-4933.43	-5238.35	-38767.5	-1485.88
		- CO2	Mt CO2			-34682.6	13740.6	-22308.3	320.11	9631.45		-41817.2	-29675.5	-32622.3	-5390.58	-2528.73		-37278	-2485.85	-18878.2	27834.4	1.4217	-32995.7	10280.9	-13605.5	2583.37	8220.7	-22141.4	-18428	-24020.4	-1051.91	-4199.62	-20207.9	-4071.34	-9937.98	18128.9	36700.4	-36482.3	-1520.36	-22330.2	8363.59	13479.2	-40720.7	-22553.6	-33111.1	-2036.85	-4543.11	-31374.6	1665.82
		- N2O	Mt CO2 equivalents ***			-5086.65	-1535.59	-2376.91	-2328.78	869.385		-4970.85	-2292.63	-2220.31	-1884.97	1179.84		-5766.93	-2720.44	-2310.57	-1846.23	967.934	-4320.73	-1149.86	-1768.9	-1574.87	910.569	-3931.75	-1845.54	-1604.97	-1536.1	896.384	-4071.54	-2033.88	-1684.24	-1818.63	1126.83	-4692.99	-2004.23	-2379.38	-2147.78	504.961	-4982.77	-2395.03	-2230.5	-2017.58	1123.37	-5625.76	-2347.38
		- CH4	Mt CO2 equivalents ***			-491.742	-637.548	-283.033	1534.45	-853.264		-783.673	-653.12	-112.679	135.653	-1477.81		-1709.72	-841.364	-347.871	-1854.8	-2479.91	-211.636	-1128.73	-845.437	356.361	-732.88	-47.6306	-1074.82	-224.774	105.271	-1176.92	-2207.93	-1094.93	-544.231	-1927.59	-2554.23	-1159.02	745.256	347.46	480.92	-264.115	-956.338	-818.455	-230.469	-879.005	-1818.61	-1767.13	-804.328
		Change in cumulative emissions *****	%			-7.10245	2.04061	-4.40466	-0.0836567	1.70193		-9.28373	-6.36612	-6.8216	-1.39337	-0.551637		-8.11411	-1.09645	-3.90464	4.37543	-0.273866	-6.62033	1.41169	-2.86134	0.240775	1.48156	-5.09753	-4.16619	-5.0447	-0.484513	-0.874313	-4.80221	-1.3054	-2.2058	2.60761	6.39506	-7.4682	-0.490303	-4.29773	1.18137	2.42035	-9.10577	-5.02851	-6.94197	-0.96277	-1.02228	-7.02862	-0.269393
		- CO2	%			-27.9997	11.0929	-18.0098	0.258428	7.77559		-60.2141	-42.7308	-46.974	-7.76208	-3.6412		-46.9278	-3.12934	-23.7651	35.0396	0.00178972	-26.6378	8.29991	-10.9839	2.08559	6.63667	-31.8822	-26.5352	-34.5877	-1.51468	-6.04718	-25.4389	-5.12525	-12.5105	22.8218	46.2007	-29.4526	-1.22741	-18.0274	6.75202	10.8819	-58.6352	-32.4758	-47.6778	-2.93293	-6.54178	-39.4963	2.09704
		- N2O	%			-4.23125	-1.27736	-1.97719	-1.93716	0.723185		-4.49205	-2.0718	-2.00645	-1.70341	1.0662		-4.61287	-2.17604	-1.84819	-1.47677	0.774234	-3.59414	-0.956496	-1.47143	-1.31003	0.757443	-3.55304	-1.66778	-1.45038	-1.38814	0.810043	-3.25676	-1.62687	-1.34719	-1.4547	0.901331	-3.9038	-1.66719	-1.97925	-1.78659	0.420044	-4.50282	-2.16433	-2.01566	-1.82324	1.01517	-4.49996	-1.87763
		- CH4	%			-0.152347	-0.19752	-0.087687	0.475392	-0.264351		-0.235823	-0.196537	-0.0339075	0.0408208	-0.444704		-0.492557	-0.242391	-0.100219	-0.534355	-0.714442	-0.0655674	-0.349693	-0.261926	0.110405	-0.227055	-0.014333	-0.323434	-0.067639	0.0316781	-0.35416	-0.636088	-0.31544	-0.156789	-0.555323	-0.735854	-0.359077	0.230889	0.107647	0.148995	-0.0818261	-0.287781	-0.24629	-0.0693528	-0.26451	-0.547256	-0.509096	-0.231721
	* Crop Residues include above- and belowground residues
	** 2005 values are already projections, model starts in 1995
	*** 100 yr Global Warming Potentials of 34 (CH4) and 298 (N2O) used according to IPCC AR5 (2013)
	**** Includes atmospheric deposition, soil organic matter loss and seed
	***** Change relative to reference scenario in 2050 of the same storyline
	Mt = million tons
	Tg = Terragram
	ha = hectare
[truncated: 3 more columns]
